1 **Full title: Development and validation of a nomogram for predicting overall**  
 2 **survival of patients with ischemic cardiomyopathy and heart failure: a post-hoc**  
 3 **analysis of the Surgical Treatments for Ischemic Heart Failure (STICH) trail.**

4  
 5 **Authors:**

6 Pengju Guo \*, MD, PhD; Chang He, MD; Junlei Li, MD, PhD; Youxu Jiang, MD, PhD;  
 7 Feng Wang, MD; Jiaxiang Wang, MD; Bin Lin, MD; Deguang Feng, MD.

8  
 9 **Pengju Guo**, Department of Cardiovascular surgery, the First Affiliated Hospital of  
 10 Zhengzhou University, Zhengzhou, Henan 450000, People's Republic of China,  
 11 [fccguopj@zzu.edu.cn](mailto:fccguopj@zzu.edu.cn)

12 **Chang He**, Department of Cardiovascular surgery, the First Affiliated Hospital of  
 13 Zhengzhou University, Zhengzhou, Henan 450000, People's Republic of China,  
 14 [hchleo@yeah.net](mailto:hchleo@yeah.net)

15 **Junlei Li**, Department of Cardiology, the First Affiliated Hospital of Zhengzhou  
 16 University, Zhengzhou, Henan 450000, People's Republic of China,  
 17 [junleizzu@163.com](mailto:junleizzu@163.com)

18 **Youxu Jiang**, Department of Cardiology, the Second Affiliated Hospital of  
 19 Zhengzhou University, Zhengzhou, Henan 450000, People's Republic of China,  
 20 [doctorjyx@163.com](mailto:doctorjyx@163.com)

21 **Feng Wang**, Department of Cardiovascular surgery, the First Affiliated Hospital of  
 22 Zhengzhou University, Zhengzhou, Henan 450000, People's Republic of China,

23 [wangfeng171620@163.com](mailto:wangfeng171620@163.com)

24 **Jiaxiang Wang**, Department of Cardiovascular surgery, the First Affiliated Hospital of  
25 Zhengzhou University, Zhengzhou, Henan 450000, People's Republic of China,  
26 [wangjiaxiang171619@163.com](mailto:wangjiaxiang171619@163.com)

27 **Bin Lin**, Department of Cardiovascular surgery, the First Affiliated Hospital of  
28 Zhengzhou University, Zhengzhou, Henan 450000, People's Republic of China,  
29 [linbin171621@163.com](mailto:linbin171621@163.com)

30 **Deguang Feng**, Department of Cardiovascular surgery, the First Affiliated Hospital of  
31 Zhengzhou University, Zhengzhou, Henan 450000, People's Republic of China,  
32 [fengdeguang171618@163.com](mailto:fengdeguang171618@163.com)

33

34 **Shout title:** STICH trail: Nomogram to predict overall survival.

35

36 **\* Corresponding author:**

37 **Pengju Guo**, [fccguopj@zzu.edu.cn](mailto:fccguopj@zzu.edu.cn); address: No.1 Jianshe Dong Road, ErQi District,  
38 Zhengzhou, Henan, China.

39

40 **Total word count:** 5931

41

42 **Development and validation of a nomogram for predicting overall survival of**  
 43 **patients with ischemic cardiomyopathy and heart failure: a post-hoc analysis of**  
 44 **the Surgical Treatments for Ischemic Heart Failure (STICH) trail.**

45

46 **Abstract**

47 **Purpose:** To establish a nomogram for predicting the overall survival (OS) of patients  
 48 with ischemic cardiomyopathy and heart failure based on the Surgical Treatment for  
 49 Ischemic Heart Failure (STICH) trail.

50 **Methods:** Patients who had valid key variables in the hypothesis 1 were included and  
 51 randomly divided into the training and validation groups (7:3 ratio). Using Cox  
 52 proportional hazards model, predictors for the OS in training group were identified  
 53 and integrated to establish a nomogram for predicting 1-year, 3-year, 5-year, and  
 54 ten-year survival probability. The nomogram performance was evaluated using  
 55 Harrell's concordance index (C-index), time-dependent receiver operating  
 56 characteristic curve, decision curve analysis, and Kaplan-Meier survival analysis.

57 **Results:** 940 of 1212 patients who had valid key variables were included. Seven  
 58 predictors, including treatment type, gender, estimated glomerular filtration rate,  
 59 Charlson co-morbidity index, 6-minute walk, end-systolic volume index and mitral  
 60 regurgitation class were identified to establish the nomogram. The C-indices of the  
 61 nomogram were 0.641 (95% CI: 0.627-0.655) and 0.649 (95% CI: 0.627-0.671) for  
 62 training and validation groups, respectively. The calibration curves revealed  
 63 consistency between predicted and observed survival. The area under 1-year, 3-year,

64 5-year, and ten-year OS receiver operating characteristic curves were 0.634, 0.616,  
65 0.630 and 0.638 in the training group, respectively. Decision curve analysis showed  
66 effective net benefits of the model in clinical decision-making. Divided by the cutoff  
67 values of prognostic indices, low-risk patients showed better OS than those with high  
68 risk in training and validation groups (both  $p < 0.0001$ ).

69 **Conclusion:** The current nomogram can effectively predict the OS of patients with  
70 ischemic cardiomyopathy and heart failure, provide information about multidisciplinary  
71 therapeutic that may prolong the survival time, and serve as a perfect tool in  
72 conjunction with the STS and EuroSCORE II risk models in clinical decision making.

74 **Keywords:** Ischemic cardiomyopathy; Heart failure; Coronary artery bypass grafting;  
75 Survival; STICH

## 77 Nonstandard Acronyms and Abbreviations

|      |                                    |
|------|------------------------------------|
| OS   | overall survival                   |
| ICM  | ischemic cardiomyopathy            |
| CABG | coronary artery bypass grafting    |
| PCI  | percutaneous coronary intervention |
| LVEF | left ventricular ejection fraction |
| CAD  | coronary artery disease            |
| NYHA | New York Heart Association         |
| MR   | mitral regurgitation               |

|         |                                                   |
|---------|---------------------------------------------------|
| ESVI    | end-systolic volume index                         |
| eGFR    | estimated glomerular filtration rate              |
| CKD-EPI | Chronic Kidney Disease Epidemiology Collaboration |
| CCI     | Charlson co-morbidity index                       |
| MED     | medical                                           |
| IQR     | interquartile range                               |
| ROC     | receiver operating characteristic                 |
| DCA     | Decision Curve Analysis                           |
| HR      | hazards ratio                                     |
| CI      | confidence interval                               |
| AUC     | area under curve                                  |

78

79

## 1. Introduction

Multifaceted strategies to address the control of worldwide prevalence of ischemic cardiomyopathy (ICM) and heart failure, which are projected to affect 8 million US population by 2030, have progressively gained advances during last decades.<sup>1</sup> Coronary artery bypass grafting (CABG) has become the preferred recommendation for patients with ICM and heart failure in contemporary guidelines with decreasing heterogeneous consensus.<sup>2-4</sup> However, the realistic concern of triple risk of death within the initial 30 days after randomization among patients who underwent CABG plus medical therapy compared with those received medical therapy alone, identified by the Surgical Treatment for Ischemic Heart Failure (STICH) trial, makes the ultimate clinical decision requiring courage to take a crucial step.<sup>5,6</sup> This trend toward conservation has resulted the overzealous use of percutaneous coronary intervention (PCI) by nearly triple usage higher than CABG at clinician discretion, but without high-quality evidence.<sup>7,8</sup> Due to the Society of Thoracic Surgeons (STS) and EuroSCORE II risk models were developed to estimate the early postoperative mortality, the long-term survival in this difficult management but life-prolonging entity can be hardly predicted.<sup>9,10</sup> Similarly, given the extensive coexisting comorbidities among patients with ICM and heart failure, a dilemma surrounding the implement of the SYNTAX (Synergy Between PCI with TAXUS and Cardiac Surgery) score II 2020 is the interobserver variability and absence of clinical variables, which may largely compromise the generalizability of the model.<sup>11,12</sup>

Landmark results of the STICH trail have driven progress in our understanding of

this specific cohort.<sup>5,13</sup> In the setting of contemporary era of personalized medicine, clinical decision should be patient-centered, which can be achieved through the ascertainment and quantification of survival probability with the engagement of clinicians and patients. However, to the best of our knowledge, there is no specific risk model to predict the overall survival (OS) of patients with ICM and heart failure. Accordingly, we constructed a nomogram based on clinical variables derived from the STICH trial to predict the OS of this specific cohort.

## 2. Methods

### 2.1 Patient source

The current study was a post-hoc analysis of the STICH trial (funded by the National Institutes of Health, NCT00023595), and approved by the National Heart, Lung, and Blood Institute and our institutional review board (2022-KY-1409-002). The data was accessed via the Biologic Specimen and Data Repository Information Coordinating Center. The STICH trial and extended follow-up have previously reported in detail.<sup>5,14</sup> Among 1212 patients with an left ventricular ejection fraction (LVEF)  $\leq 35\%$  and coronary artery disease (CAD) amenable to CABG in hypothesis 1, 940 patients, who had valid preoperative information of age, gender, race, New York Heart Association (NYHA) heart function class, medical history, mitral regurgitation (MR) class, previous revascularization (CABG or PCI), distance of 6-minute walk, LVEF, left ventricular end-systolic volume index (ESVI), Duke CAD index, creatinine, and follow-up information of treatment received, days from randomization to CABG,

years of follow-up time, and patients status at the last follow-up, were included in the current study. The detail screening process of patients was shown in Figure 1. The eligible cases were randomly stratified into training and validation groups (7:3 ratio). Each patient provided written informed consent and the investigation complied with the principles outlined in the Declaration of Helsinki.

## 2.2 Measurable variables and outcomes

For ease of comparison, age ( $\leq 50$ , 51 – 60, 61 – 70, and  $\geq 71$  years), 6-minute walk ( $\leq 300$  and  $> 300$ m), LVEF ( $\leq 20\%$ , 21 – 25%, 26 – 30%, and 31 – 35%), ESVI ( $\leq 60$ , 61 – 90, and  $\geq 90$  ml/m<sup>2</sup>), and Duke CAD Index ( $\leq 40$ , 41 – 70, 71 – 100) were translated into categorical variables. The estimated glomerular filtration rate (eGFR) was calculated using the Chronic Kidney Disease Epidemiology Collaboration (CKD-EPI) equation, and then categorized as  $> 60$  ml/min per 1.73m<sup>2</sup> or  $\leq 60$  ml/min per 1.73m<sup>2</sup>.<sup>15</sup> The Charlson co-morbidity index (CCI) for each patient was accounted based on medical history.<sup>16,17</sup>

Considering the predictive nature of the model, patients who received CABG within 90 days after randomization were assigned to the CABG group (CABG + MED) in the current study, and to medical group (MED) otherwise regardless of whether CABG was implemented exceeding 90 days after randomization. The patient status at the last follow-up was screened and OS was considered as the primary outcome of interest. The duration of survival was defined as the date from randomization to the data of death or last contact.

## 2.3 Statistical analysis



Baseline characteristics were described by frequencies and percentages for categorical variables and by medians (interquartile range [IQR]) for continuous variables. Baseline differences between training and validation groups were compared using Chi-square or Fisher's exact tests for categorical variable. Univariate and multivariate Cox proportional hazards models were performed to identify the independent predictors for OS in the training group.

Based on the predictors identified by multivariate Cox proportional hazards model, current nomogram was developed to predict the 1-year, 3-year, 5-year, and ten-year survival probability of patients with ICM and heart failure. Harrell's concordance index (C-index) and time-dependent receiver operating characteristic (ROC) curve were used to evaluate the discrimination of the nomogram for predicting the survival outcomes between different patients. The differences between predicted and actual risks were visualized using calibration curves. Bootstraps with 1000 resamples were performed to calculate the C-indices and plot calibration curves. The net benefit of the nomogram for decision-making was evaluated using Decision Curve Analysis (DCA). The prognostic index of 1-year OS for each patient was calculated using independent predictors and corresponding hazards ratio. Based on the cutoff values of prognostic indices, the training and validation groups were stratified into high-risk and low-risk groups, respectively. Kaplan-Meier survival analysis and log rank test were used to compare the OS between high-risk and low-risk groups.

All statistical analyses were conducted using R software (version 4.2.2, <http://www.r-project.org/>) and two-sided. Statistical significance was set at  $P < 0.05$ .

168

## 169 **3. Results**

### 170 **3.1. Baseline characteristics**

171 A total of 940 patients who had valid key variables were included, and randomly  
172 stratified into training group (660 cases) and validation group (280 cases) based on  
173 7:3 ratio. The baseline characteristics of entire cohort, training and validation groups  
174 were showed in the Table 1. There was no significant difference between training and  
175 validation groups with regard to each variable. The median follow-up time was 7.3  
176 years (IQR: 2.9 - 9.4 years) for training group and 6.7 years (IQR: 3.2 - 9.3 years) for  
177 validation group. There were 406 and 177 deaths recorded in the training and  
178 validation groups, respectively.

### 179 **3.2. Identification of the independent predictors**

180 Univariate and multivariate Cox proportional hazards models were performed to  
181 identify the independent predictors for OS in the training group. In the multivariate  
182 analysis, seven variables, including treatment type ( $P = 0.032$ ), gender ( $P < 0.001$ ),  
183 eGFR ( $P = 0.018$ ), CCI score ( $P = 0.002$ ), 6-minute walk ( $P = 0.040$ ), ESVI ( $P = 0.006$ )  
184 and MR class ( $P < 0.001$ ) were identified as the independent predictors for OS (Table  
185 2).

### 186 **3.3. Nomogram establishment and verification**

187 The 1-year, 3-year, 5-year, and ten-year predictive nomogram of OS for patients  
188 with ICM and heart failure were established after incorporating the seven independent  
189 predictors in the multivariate Cox proportional hazards model. (Figure. 2)

Using bootstraps with 1000 resamples, the C-indices of the nomogram were 0.641 (95% CI: 0.627-0.655) and 0.649 (95% CI: 0.627-0.671) for training and validation groups, respectively. The predicted and actual risks of 1-year, 3-year, 5-year, and ten-year OS were consistent as shown in the calibration curves (Figure. 3). The values of area under curve (AUC) were 0.634, 0.616, 0.630 and 0.638 for 1-year, 3-year, 5-year and ten-year ROC curves in the training group, respectively (Figure. 4). DCA curves identified the 1-year, 3-year, 5-year and ten-year net benefits during the clinical application of the nomogram in decision-making for patients with ICM and heart failure in training and validation groups (Figure. 5). Of note, a tangible elevated trend of net benefit was shown with the extension of predicted nodal time in DCA curves. The prognostic index of 1-year OS for each patient calculated by the independent predictors and corresponding hazards ratio, and the cutoff values of prognostic indices were 6.698 and 6.833 for training and validation groups, respectively. Based on the respective cutoff values, the two groups were stratified into high-risk and low-risk groups, respectively. The Kaplan-Meier survival analysis identified better OS among patients with low-risk group compared to those with high-risk group in training and validation groups (both  $P < 0.0001$ ), confirming the excellent discriminatory power of the nomogram (Figure. 6).

#### 4. Discussion

The cardinal principle of management of patients with ICM and heart failure is to improve the health status-related quality of life and prolong lifespan. However, in light

of the dismal prognosis and scant randomized trials, divergent viewpoints have evolved among practitioners when treating this specific cohort. From this perspective, a rigorous selection process with the assistance of a specialized model covering universal and homogeneous variables among these patients to quantify the survival probability and optimize the prognostic discrimination should be implemented during counselling for clinical decision-making.

Several strengths of current nomogram are noteworthy. First, the current nomogram may inform practice in an area where, up to now, there has been no specialized model to predict overall survival for patients with ICM and heart failure. Second, the enrolled variables including the evaluation of cardiac function, physical status, comorbidities, demographics, and treatment type are multifaceted and easily accessible, and on this premise, the current nomogram may provide ease of use in the clinical setting. Third, considering the mutual causality between renal insufficiency and heart failure, according to the recommendation of the Kidney Disease: Improving Global Outcomes (KDIGO) organization, the estimated glomerular filtration rate calculated by CKD-EPI equation was endorsed to precisely evaluate the renal function instead of creatinine or creatinine clearance rate.<sup>18</sup> Fourth, it was reported more than 70% of patients enrolled in the STICH trial had a severe burden of medical co-morbidities at baseline, resulting in a ten-year mortality of approximately 70% in that cohort.<sup>19</sup> Therefore, in the current study, the available medical co-morbid conditions among these fragile patients were numerically quantified by the CCI in an effort to provide the linear relation of risk between CCI score and OS. Fifth, in light of

the tangible elevated trend of net benefit shown with the extension of predicted nodal time in DCA curves, the current nomogram can be used as a supplement to the STS and EuroSCORE II risk models for predicting long-term survival. Taken as a whole, the aforementioned strengths endowed practicality and generalizability to current nomogram in clinical decision making with the engagement of clinicians and patients.

The twice risk of mortality for male compared to female deserves attention in current study. Our result was in agreement with the finding of Pina et.al, who identified a significant diminished all-cause mortality of 33% lower among female compared to male based on STICH trail.<sup>20</sup> The extended follow-up of the MAIN-COMPARE (Ten-Year Outcomes of Stents Versus Coronary-Artery Bypass Grafting for left Main Coronary-Artery Bypass Grafting for Left Main Coronary Artery Disease) trail also revealed lower all-cause mortality and serious composite outcomes at 10 years in female compared with male, and this difference was mainly driven by the higher event rate in male during the late period between 5 and 10 years.<sup>21</sup> On the contrary, multiple lines of evidence have documented the poorer prognosis of female compared to male due to various pathologic resultant such as medical co-morbid conditions, coronary microvascular dysfunction and diastolic filling pattern.<sup>22-24</sup>. However, the 2021 ACC/AHA/SCAI guideline for coronary artery revascularization highlighted that treatment decisions for patients with CAD requiring revascularization should be based on clinical indications, regardless of gender, race, or ethnicity in an effort to mitigate disparities of care.<sup>2</sup> Yoon et.al reported that for elderly patients with ICM who had a LVEF < 40% and left ventricular end diastolic

dimension > 55mm, different genders represented distinctly predominant series of risk factors of mortality.<sup>25</sup> On this premise, the aforementioned perspectives were not inevitable in contrast to our result, and this lack of consistency should be expounded in the setting of heterogeneous confounders with respect to study cohorts, genetics, neuroendocrine activation, anatomic complexity, medications prescribed and their response to the disease process, and weights of variables.<sup>26</sup> Actually, continuing debate still urges additional attempts to address a consensus surrounding the interaction between gender and long-term survival in patients with CAD.

Several important variables with regard to the evaluation of cardiac function were failed to contribute to the construction of the current nomogram after adjusting for baseline characteristics. Undoubtedly, the hierarchical thresholds of LVEF can be used as a perfect tool to identify different subsets of patients with CAD, who have various degrees of damaged left ventricular segmental systolic function. This notwithstanding, it may not portend that they can invariably provide sufficient efficiency to predict survival for some specific cohorts. The current study was in agreement with several contemporary studies that had revealed inability of LVEF to shed light on short-term and long-term survival in patients with severe heart failure.<sup>27-30</sup> Withal, the underestimated LVEF caused by MR that accounted for 65% patients in the current cohort might also contribute to the negative statistical power. Indeed, in addition to LVEF, a series of cardiac substrate measured by echocardiography that are independent of LVEF, such as E/A ratio, severity of MR, sphericity index, ESVI, end-diastolic volume index, pulmonary artery pressure and

mechanical dyssynchrony, may typically present various degrees of adverse changes accompanied by progressive left ventricular dilatation and adverse remodeling, and have been identified as the independent risk factors for mortality.<sup>30</sup> However, due to the large number of missing values in the STICH data, some of aforementioned variables were not analyzed, thus adding residual confounding to current study.

Another indolent variable was NYHA heart failure classification which conferred a graded risk of mortality in the univariate Cox model but was blunted in multivariate analysis. This unexpected result ran counter to the prevailing wisdom of accumulated dogmas suggesting NYHA heart failure classification as a foundational criterion for risk stratification. However, the variable subjectivity and poor reproducibility have raised concerns about the accuracy of NYHA heart failure classification in evaluating prognosis. The findings of Caraballo et al. who conducted secondary analyses of four multicenter National Institutes of Health-funded heart failure clinical trials demonstrated poor discrimination across the spectrum of functional impairment and unreliable prediction of survival, based on NYHA heart failure classification.<sup>31</sup> Greene et al. compared the NYHA heart failure classification and the Kansas City Cardiomyopathy Questionnaire Overall Summary Score (KCCQ-OS) with respect to clinically meaningful changes in health status over time, and found that changes in NYHA heart failure classification failed to translated into a benefit of clinical outcomes with respect to all-cause mortality, heart failure hospitalization, and these two composition.<sup>32</sup> Obviously, the STICH trial inevitably suffered the aforementioned limitations from the fact that patients were recruited from 99 medical centers in 22

300 countries.

301 The current study can provide actionable evidence for contemporary practice in the  
302 following aspects. First, our results enhanced the consensus that CABG in  
303 conjunction with guideline-directed medical therapies could be the preferred  
304 recommendation for patients with ICM and heart failure by reducing 20% risk of  
305 all-cause mortality compared to medical therapy alone. Second, on the basis of  
306 concern about the high weight of comorbidities in current nomogram, a  
307 comprehensive multidisciplinary therapeutic is warranted and may potentially improve  
308 the survival time. Third, given the reversibility of ischemic MR, strategies to reduce  
309 the severity of MR are urgent in an effort to reduce the mortality, whether or not  
310 CABG or medical therapy alone is selected. Fourth, the current nomogram in  
311 conjunction with the STS and EuroSCORE II risk models may serve as a perfect tool  
312 in clinical decision making with the engagement of clinicians and patients.

313 Our study cannot avoid certain inevitable limitations due to the post-hoc nature and  
314 lack of external validation. Due to the large number of missing values, several vital  
315 variables were not collected, and selection biases added insufficiently corrected  
316 residual confounding to current study. The small size of subgroups of MR and NYHA  
317 heart failure classification can be translated into heterogeneity, compromising the  
318 reliability of the nomogram. The fact that several medical co-morbidities were not  
319 recorded in the STICH trial caused the underestimated CCI scores. Based on the  
320 STICH protocol, the generalizability of current nomogram might not be suitable for  
321 patients who have the conditions among exclusion criteria. Therefore, our results



should be interpreted with caution and external validation is warranted.

## 5. Conclusion

The current study developed a specified nomogram containing seven multifaceted and easily accessible variables to predict the OS for patients with ICM and heart failure, and provided information about multidisciplinary therapeutic that may prolong the survival time. This nomogram in conjunction with the STS and EuroSCORE II risk models may serve as a perfect tool in clinical decision making with the engagement of clinicians and patients.

**Acknowledgments:** Conception and design: Pengju Guo and Chang He. Acquisition of data: Pengju Guo. Analysis and interpretation of data: Pengju Guo and Chang He; Manuscript writing: Pengju Guo. Revision: Junlei LI, Youxu Jiang, Feng Wang, Jiaxiang Wang, Bin Lin, and Deguang Feng. All the authors listed have approved the manuscript that is enclosed and agree with its content.

**Sources of Funding:** None.

**Disclosures:** All authors have declared no conflicts of interest.

## References

1. Virani SS, Alonso A, Benjamin EJ, Bittencourt MS, Callaway CW, Carson AP, Chamberlain AM, Chang AR, Cheng S, Delling FN, et al. Heart Disease and Stroke Statistics-2020 Update: A Report From the American Heart Association.

- 344            *Circulation*. 2020;141:e139-e596. doi: 10.1161/CIR.0000000000000757
- 345    2.    Lawton JS, Tamis-Holland JE, Bangalore S, Bates ER, Beckie TM, Bischoff  
346            JM, Bittl JA, Cohen MG, DiMaio JM, Don CW, et al. 2021 ACC/AHA/SCAI  
347            Guideline for Coronary Artery Revascularization: A Report of the American  
348            College of Cardiology/American Heart Association Joint Committee on Clinical  
349            Practice        Guidelines.        *Circulation*.        2022;145:e18-e114.        doi:  
350            10.1161/CIR.0000000000001038
- 351    3.    Neumann FJ, Sousa-Uva M, Ahlsson A, Alfonso F, Banning AP, Benedetto U,  
352            Byrne RA, Collet JP, Falk V, Head SJ, et al. 2018 ESC/EACTS Guidelines on  
353            myocardial revascularization. *Eur Heart J*. 2019;40:87-165. doi:  
354            10.1093/eurheartj/ehy394
- 355    4.    Heidenreich PA, Bozkurt B, Aguilar D, Allen LA, Byun JJ, Colvin MM, Deswal A,  
356            Drazner MH, Dunlay SM, Evers LR, et al. 2022 AHA/ACC/HFSA Guideline for  
357            the Management of Heart Failure: A Report of the American College of  
358            Cardiology/American Heart Association Joint Committee on Clinical Practice  
359            Guidelines.        *Circulation*.        2022;145:e895-e1032.        doi:  
360            10.1161/CIR.0000000000001063
- 361    5.    Velazquez EJ, Lee KL, Jones RH, Al-Khalidi HR, Hill JA, Panza JA, Michler RE,  
362            Bonow RO, Doenst T, Petrie MC, et al. Coronary-Artery Bypass Surgery in  
363            Patients with Ischemic Cardiomyopathy. *N Engl J Med*. 2016;374:1511-1520.  
364            doi: 10.1056/NEJMoa1602001
- 365    6.    Wrobel K, Stevens SR, Jones RH, Selzman CH, Lamy A, Beaver TM, Djokovic

- 366 LT, Wang N, Velazquez EJ, Sopko G, et al. Influence of Baseline  
367 Characteristics, Operative Conduct, and Postoperative Course on 30-Day  
368 Outcomes of Coronary Artery Bypass Grafting Among Patients With Left  
369 Ventricular Dysfunction: Results From the Surgical Treatment for Ischemic  
370 Heart Failure (STICH) Trial. *Circulation*. 2015;132:720-730. doi:  
371 10.1161/CIRCULATIONAHA.114.014932
- 372 7. Crea F. Treatment of heart failure across the spectrum of left ventricular  
373 ejection fraction and an update on cardiac amyloidosis and ischaemic  
374 cardiomyopathy. *Eur Heart J*. 2022;43:351-354. doi:  
375 10.1093/eurheartj/ehab906
- 376 8. Pathak S, Lai FY, Miksza J, Petrie MC, Roman M, Murray S, Dearling J,  
377 Perera D, Murphy GJ. Surgical or percutaneous coronary revascularization for  
378 heart failure: an in silico model using routinely collected health data to emulate  
379 a clinical trial. *Eur Heart J*. 2023;44:351-364. doi: 10.1093/eurheartj/ehac670
- 380 9. O'Brien SM, Feng L, He X, Xian Y, Jacobs JP, Badhwar V, Kurlansky PA,  
381 Furnary AP, Cleveland JC, Jr., Lobdell KW, et al. The Society of Thoracic  
382 Surgeons 2018 Adult Cardiac Surgery Risk Models: Part 2-Statistical Methods  
383 and Results. *Ann Thorac Surg*. 2018;105:1419-1428. doi:  
384 10.1016/j.athoracsur.2018.03.003
- 385 10. Nashef SA, Roques F, Sharples LD, Nilsson J, Smith C, Goldstone AR,  
386 Lockowandt U. EuroSCORE II. *Eur J Cardiothorac Surg*. 2012;41:734-744;  
387 discussion 744-735. doi: 10.1093/ejcts/ezs043

- 388 11. Takahashi K, Serruys PW, Fuster V, Farkouh ME, Spertus JA, Cohen DJ, Park  
389 SJ, Park DW, Ahn JM, Kappetein AP, et al. Redevelopment and validation of  
390 the SYNTAX score II to individualise decision making between percutaneous  
391 and surgical revascularisation in patients with complex coronary artery disease:  
392 secondary analysis of the multicentre randomised controlled SYNTAXES trial  
393 with external cohort validation. *Lancet*. 2020;396:1399-1412. doi:  
394 10.1016/S0140-6736(20)32114-0
- 395 12. Lawton JS, Tamis-Holland JE, Bangalore S, Bates ER, Beckie TM, Bischoff  
396 JM, Bittl JA, Cohen MG, DiMaio JM, Don CW, et al. 2021 ACC/AHA/SCAI  
397 Guideline for Coronary Artery Revascularization: Executive Summary: A  
398 Report of the American College of Cardiology/American Heart Association  
399 Joint Committee on Clinical Practice Guidelines. *Circulation*. 2022;145:e4-e17.  
400 doi: 10.1161/CIR.0000000000001039
- 401 13. Velazquez EJ, Lee KL, Deja MA, Jain A, Sopko G, Marchenko A, Ali IS,  
402 Pohost G, Gradinac S, Abraham WT, et al. Coronary-artery bypass surgery in  
403 patients with left ventricular dysfunction. *N Engl J Med*. 2011;364:1607-1616.  
404 doi: 10.1056/NEJMoa1100356
- 405 14. Velazquez EJ, Lee KL, O'Connor CM, Oh JK, Bonow RO, Pohost GM,  
406 Feldman AM, Mark DB, Panza JA, Sopko G, et al. The rationale and design of  
407 the Surgical Treatment for Ischemic Heart Failure (STICH) trial. *J Thorac*  
408 *Cardiovasc Surg*. 2007;134:1540-1547. doi: 10.1016/j.jtcvs.2007.05.069
- 409 15. Levey AS, Stevens LA, Schmid CH, Zhang YL, Castro AF, 3rd, Feldman HI,

410 Kusek JW, Eggers P, Van Lente F, Greene T, et al. A new equation to estimate  
411 glomerular filtration rate. *Ann Intern Med.* 2009;150:604-612. doi:  
412 10.7326/0003-4819-150-9-200905050-00006

413 16. Charlson ME, Pompei P, Ales KL, MacKenzie CR. A new method of classifying  
414 prognostic comorbidity in longitudinal studies: development and validation. *J*  
415 *Chronic Dis.* 1987;40:373-383. doi: 10.1016/0021-9681(87)90171-8

416 17. Charlson M, Szatrowski TP, Peterson J, Gold J. Validation of a combined  
417 comorbidity index. *J Clin Epidemiol.* 1994;47:1245-1251. doi:  
418 10.1016/0895-4356(94)90129-5

419 18. Stevens PE, Levin A, Kidney Disease: Improving Global Outcomes Chronic  
420 Kidney Disease Guideline Development Work Group M. Evaluation and  
421 management of chronic kidney disease: synopsis of the kidney disease:  
422 improving global outcomes 2012 clinical practice guideline. *Ann Intern Med.*  
423 2013;158:825-830. doi: 10.7326/0003-4819-158-11-201306040-00007

424 19. Ambrosy AP, Stevens SR, Al-Khalidi HR, Rouleau JL, Bouabdallaoui N,  
425 Carson PE, Adlbrecht C, Cleland JGF, Dabrowski R, Golba KS, et al. Burden  
426 of medical co-morbidities and benefit from surgical revascularization in  
427 patients with ischaemic cardiomyopathy. *Eur J Heart Fail.* 2019;21:373-381.  
428 doi: 10.1002/ejhf.1404

429 20. Pina IL, Zheng Q, She L, Szwed H, Lang IM, Farsky PS, Castelveccchio S,  
430 Biernat J, Paraforos A, Kosevic D, et al. Sex Difference in Patients With  
431 Ischemic Heart Failure Undergoing Surgical Revascularization: Results From

- the STICH Trial (Surgical Treatment for Ischemic Heart Failure). *Circulation*.  
2018;137:771-780. doi: 10.1161/CIRCULATIONAHA.117.030526
21. Yoon YH, Ahn JM, Lee JB, Kang DY, Park H, Jeong YJ, Lee J, Kim JH, Yang  
Y, Hyun J, et al. Time-Dependent Impact of Sex on the Long-Term Outcomes  
After Left Main Revascularization. *J Am Heart Assoc*. 2022;11:e021720. doi:  
10.1161/JAHA.121.021720
22. Sun LY, Tu JV, Bader Eddeen A, Liu PP. Prevalence and Long-Term Survival  
After Coronary Artery Bypass Grafting in Women and Men With Heart Failure  
and Preserved Versus Reduced Ejection Fraction. *J Am Heart Assoc*. 2018;7.  
doi: 10.1161/JAHA.118.008902
23. Taqueti VR, Di Carli MF. Coronary Microvascular Disease Pathogenic  
Mechanisms and Therapeutic Options: JACC State-of-the-Art Review. *J Am  
Coll Cardiol*. 2018;72:2625-2641. doi: 10.1016/j.jacc.2018.09.042
24. Kwan AC, Wei J, Ouyang D, Ebinger JE, Merz CNB, Berman D, Cheng S. Sex  
differences in contributors to coronary microvascular dysfunction. *Front  
Cardiovasc Med*. 2023;10:1085914. doi: 10.3389/fcvm.2023.1085914
25. Yoon HJ, Kim KH, Lee N, Park H, Kim HY, Cho JY, Ahn Y, Jeong MH.  
Sex-Specific Predictors of Long-Term Mortality in Elderly Patients with  
Ischemic Cardiomyopathy. *J Clin Med*. 2023;12. doi: 10.3390/jcm12052012
26. Mosca L, Barrett-Connor E, Wenger NK. Sex/gender differences in  
cardiovascular disease prevention: what a difference a decade makes.  
*Circulation*. 2011;124:2145-2154. doi:

10.1161/CIRCULATIONAHA.110.968792

27. Alla F, Briancon S, Juilliere Y, Mertes PM, Villemot JP, Zannad F. Differential clinical prognostic classifications in dilated and ischemic advanced heart failure: the EPICAL study. *Am Heart J*. 2000;139:895-904. doi: 10.1016/s0002-8703(00)90023-1

28. Zhou Z, Zhuang X, Liu M, Jian B, Fu G, Liao X, Wu Z, Liang M. Left ventricular volume change and long-term outcomes in ischaemic cardiomyopathy with or without surgical revascularisation: A post-hoc analysis of a randomised controlled trial. *EClinicalMedicine*. 2022;53:101626. doi: 10.1016/j.eclinm.2022.101626

29. Prior DL, Stevens SR, Holly TA, Krejca M, Paraforos A, Pohost GM, Byrd K, Kukulski T, Jones RH, Desvigne-Nickens P, et al. Regional left ventricular function does not predict survival in ischaemic cardiomyopathy after cardiac surgery. *Heart*. 2017;103:1359-1367. doi: 10.1136/heartjnl-2016-310693

30. Kim KH, She L, Lee KL, Dabrowski R, Grayburn PA, Rajda M, Prior DL, Desvigne-Nickens P, Zoghbi WA, Senni M, et al. Incremental prognostic value of echocardiography of left ventricular remodeling and diastolic function in STICH trial. *Cardiovasc Ultrasound*. 2020;18:17. doi: 10.1186/s12947-020-00195-1

31. Caraballo C, Desai NR, Mulder H, Alhanti B, Wilson FP, Fiuzat M, Felker GM, Piña IL, O'Connor CM, Lindenfeld J, et al. Clinical Implications of the New York Heart Association Classification. *Journal of the American Heart Association*.

476 2019;8. doi: 10.1161/jaha.119.014240

477 32. Greene SJ, Butler J, Spertus JA, Hellkamp AS, Vaduganathan M, DeVore AD,

478 Albert NM, Duffy CI, Patterson JH, Thomas L, et al. Comparison of New York

479 Heart Association Class and Patient-Reported Outcomes for Heart Failure

480 With Reduced Ejection Fraction. *JAMA Cardiology*. 2021;6. doi:

481 10.1001/jamacardio.2021.0372

482

483



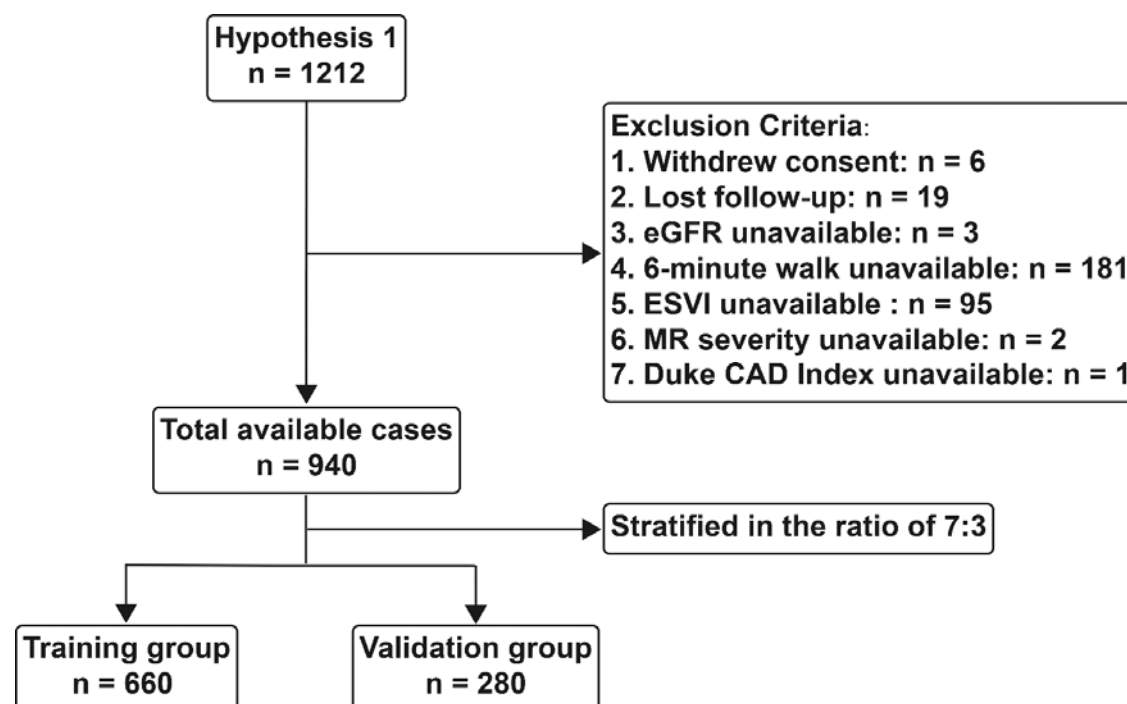

**Figure 1.** Flow diagram of patient selection. eGFR = estimated glomerular filtration rate; ESVI = end-systolic volume index; MR = mitral regurgitation; CAD = coronary artery disease.

| Variables            | Overall<br>(n = 940) | Training group<br>(n = 660) | Validation group<br>(n = 280) | p value |
|----------------------|----------------------|-----------------------------|-------------------------------|---------|
| <b>Age (%)</b>       |                      |                             |                               | 0.564   |
| ≤ 50                 | 139 (14.8)           | 103 (15.6)                  | 36 (12.9)                     |         |
| 51 - 60              | 384 (40.9)           | 273 (41.4)                  | 111 (39.6)                    |         |
| 61 - 70              | 284 (30.2)           | 193 (29.2)                  | 91 (32.5)                     |         |
| ≥ 71                 | 133 (14.1)           | 91 (13.8)                   | 42 (15.0)                     |         |
| <b>Gender (%)</b>    |                      |                             |                               | 0.603   |
| Male                 | 828 (88.1)           | 579 (87.3)                  | 249 (88.9)                    |         |
| Female               | 112 (11.9)           | 81 (12.3)                   | 31 (11.1)                     |         |
| <b>Ethnicity (%)</b> |                      |                             |                               | 0.610   |
| White                | 639 (68.0)           | 452 (68.5)                  | 187 (66.8)                    |         |
| Other                | 301 (32.0)           | 208 (31.5)                  | 93 (33.3)                     |         |
| <b>eGFR (%)</b>      |                      |                             |                               | 0.117   |

|                                    |            |            |            |       |
|------------------------------------|------------|------------|------------|-------|
| > 60 ml/min per 1.73m <sup>2</sup> | 697 (74.1) | 499 (75.6) | 198 (70.7) |       |
| ≤ 60 ml/min per 1.73m <sup>2</sup> | 243 (25.9) | 161 (24.4) | 82 (29.3)  |       |
| <b>NYHA heart failure (%)</b>      |            |            |            | 0.603 |
| Class I                            | 117 (12.4) | 85 (12.9)  | 32 (11.4)  |       |
| Class II                           | 493 (52.4) | 338 (51.2) | 155 (55.4) |       |
| Class III                          | 310 (33.0) | 224 (33.9) | 86 (30.7)  |       |
| Class IV                           | 20 (2.2)   | 13 (2.0)   | 7 (2.5)    |       |
| <b>CCI score (IQRs)</b>            | 5 (4-6)    | 5 (4-6)    | 5 (4-6)    | 0.418 |
| <b>Atrial flutter history (%)</b>  |            |            |            | 0.785 |
| Yes                                | 115 (12.2) | 82 (12.4)  | 33 (11.8)  |       |
| No                                 | 825 (87.8) | 578 (87.6) | 247 (88.2) |       |
| <b>6-minute walk (%)</b>           |            |            |            | 0.305 |
| ≤ 300 m                            | 346 (36.8) | 236 (35.8) | 110 (39.3) |       |
| > 300 m                            | 594 (63.2) | 424 (64.2) | 170 (60.7) |       |

|                                   |            |            |            |  |       |
|-----------------------------------|------------|------------|------------|--|-------|
| <b>LVEF (%)</b>                   |            |            |            |  | 0.457 |
| ≤ 20%                             | 173 (18.4) | 117 (17.7) | 56 (20.0)  |  |       |
| 21 - 25%                          | 216 (23.0) | 154 (23.4) | 62 (22.1)  |  |       |
| 26 - 30%                          | 281 (29.9) | 191 (28.9) | 90 (32.2)  |  |       |
| 31 - 35%                          | 270 (28.7) | 198 (30.0) | 72 (25.7)  |  |       |
| <b>ESVI (%)</b>                   |            |            |            |  | 0.965 |
| ≤ 60 ml/m <sup>2</sup>            | 263 (28.0) | 184 (27.9) | 79 (28.3)  |  |       |
| 61 - 90ml/m <sup>2</sup>          | 369 (39.2) | 258 (39.1) | 111 (39.6) |  |       |
| > 90 ml/m <sup>2</sup>            | 308 (32.8) | 218 (33.0) | 90 (32.1)  |  |       |
| <b>Previous revascularization</b> |            |            |            |  |       |
| <b>(%)</b>                        |            |            |            |  | 0.441 |
| Yes                               | 137 (14.6) | 100 (15.2) | 37 (13.2)  |  |       |
| No                                | 803 (85.4) | 560 (84.8) | 243 (86.8) |  |       |
| <b>Mitral regurgitation (%)</b>   |            |            |            |  | 0.865 |

|                           |            |            |            |       |
|---------------------------|------------|------------|------------|-------|
| None or trace             | 332 (35.3) | 235 (35.6) | 97 (34.6)  |       |
| Mild                      | 435 (46.3) | 301 (45.6) | 134 (47.9) |       |
| Moderate                  | 144 (15.3) | 102 (15.5) | 42 (15.0)  |       |
| Severe                    | 29 (3.1)   | 22 (3.3)   | 7 (2.5)    |       |
| <b>Duke CAD Index (%)</b> |            |            |            | 0.471 |
| ≤ 40                      | 277 (29.5) | 187 (28.3) | 90 (32.1)  |       |
| 41 - 70                   | 345 (36.7) | 244 (37.0) | 101 (36.1) |       |
| 71 - 100                  | 318 (33.8) | 229 (34.7) | 89 (31.8)  |       |

---

**Table 1.** Baseline characteristics for entire cohort, training and validation groups. eGFR = estimated glomerular filtration rate; NYHA = New York Heart Association; CCI = Charlson co-morbidity index; LVEF = left ventricular ejection fraction; ESVI = end-systolic volume index; CAD = coronary artery disease.

| Variables        | Univariable |               |         | Multivariable |               |         |
|------------------|-------------|---------------|---------|---------------|---------------|---------|
|                  | HR          | 95% CI        | p value | HR            | 95% CI        | p value |
| <b>Age</b>       |             |               | 0.001   |               |               | 0.391   |
| ≤ 50             | 1.0         | reference     |         | 1.0           | reference     |         |
| 51 - 60          | 1.331       | 0.971 – 1.826 | 0.076   | 0.997         | 0.708 – 1.405 | 0.987   |
| 61 - 70          | 1.745       | 1.263 – 2.411 | < 0.001 | 1.106         | 0.734 – 1.667 | 0.630   |
| ≥ 71             | 1.786       | 1.236 – 2.578 | 0.002   | 0.847         | 0.509 – 1.407 | 0.521   |
| <b>Gender</b>    |             |               |         |               |               |         |
| Female           | 1.0         | reference     |         | 1.0           | reference     |         |
| Male             | 1.756       | 1.241 – 2.485 | 0.001   | 2.069         | 1.447 – 2.957 | < 0.001 |
| <b>Ethnicity</b> |             |               |         |               |               |         |
| White            | 1.0         | reference     |         |               |               |         |
| Other            | 0.982       | 0.792 – 1.217 | 0.867   |               |               |         |
| <b>eGFR</b>      |             |               |         |               |               |         |

|                                    |       |               |         |       |               |       |
|------------------------------------|-------|---------------|---------|-------|---------------|-------|
| > 60 ml/min per 1.73m <sup>2</sup> | 1.0   | reference     |         | 1.0   | reference     |       |
| ≤ 60 ml/min per 1.73m <sup>2</sup> | 1.58  | 1.278 – 1.953 | < 0.001 | 1.342 | 1.051 – 1.713 | 0.018 |
| <b>NYHA heart failure</b>          |       |               | 0.040   |       |               | 0.718 |
| Class I                            | 1.0   | reference     |         | 1.0   | reference     |       |
| Class II                           | 1.072 | 0.780 – 1.474 | 0.670   | 0.908 | 0.657 – 1.256 | 0.560 |
| Class III                          | 1.402 | 1.011 – 1.944 | 0.043   | 1.026 | 0.726 – 1.449 | 0.885 |
| Class IV                           | 1.689 | 0.827 – 3.449 | 0.150   | 1.106 | 0.527 – 2.319 | 0.790 |
| <b>CCI score</b>                   | 1.215 | 1.139 – 1.297 | < 0.001 | 1.175 | 1.063 – 1.300 | 0.002 |
| <b>Atrial flutter history</b>      |       |               |         |       |               |       |
| No                                 | 1.0   | reference     |         | 1.0   | reference     |       |
| Yes                                | 1.646 | 1.253 – 2.162 | < 0.001 | 1.315 | 0.985 – 1.756 | 0.064 |
| <b>6-minute walk</b>               |       |               |         |       |               |       |
| ≤ 300 m                            | 1.0   | reference     |         | 1.0   | reference     |       |
| > 300 m                            | 0.762 | 0.624 – 0.931 | 0.008   | 0.796 | 0.640 – 0.989 | 0.040 |

|                             |       |               |         |       |               |         |  |
|-----------------------------|-------|---------------|---------|-------|---------------|---------|--|
| <b>LVEF</b>                 |       |               |         | 0.050 |               |         |  |
| ≤ 20%                       | 1.0   | reference     |         |       |               |         |  |
| 21 - 25%                    | 0.931 | 0.696 – 1.247 | 0.633   |       |               |         |  |
| 26 - 30%                    | 0.706 | 0.529 – 0.943 | 0.018   |       |               |         |  |
| 31 - 35%                    | 0.760 | 0.572 – 1.009 | 0.058   |       |               |         |  |
| <b>ESVI</b>                 |       |               | < 0.001 |       |               | 0.006   |  |
| ≤ 60 ml/m <sup>2</sup>      | 1.0   | reference     |         | 1.0   | reference     |         |  |
| 61 - 90ml/m <sup>2</sup>    | 1.458 | 1.132 – 1.877 | 0.003   | 1.441 | 1.109 – 1.874 | 0.006   |  |
| > 90 ml/m <sup>2</sup>      | 1.608 | 1.241 – 2.082 | < 0.001 | 1.517 | 1.161 – 1.981 | 0.002   |  |
| <b>Previous</b>             |       |               |         |       |               |         |  |
| <b>revascularization</b>    |       |               |         |       |               |         |  |
| No                          | 1.0   | reference     |         |       |               |         |  |
| Yes                         | 1.043 | 0.799 – 1.362 | 0.758   |       |               |         |  |
| <b>Mitral regurgitation</b> |       |               | < 0.001 |       |               | < 0.001 |  |



|                       |       |               |         |       |               |         |
|-----------------------|-------|---------------|---------|-------|---------------|---------|
| None or trace         | 1.0   | reference     |         | 1.0   | reference     |         |
| Mild                  | 1.148 | 0.918 – 1.436 | 0.226   | 1.181 | 0.941 – 1.482 | 0.151   |
| Moderate              | 1.769 | 1.328 – 2.357 | < 0.001 | 1.467 | 1.091 – 1.971 | 0.011   |
| Severe                | 2.747 | 1.676 – 4.503 | < 0.001 | 3.359 | 2.022 – 5.580 | < 0.001 |
| <b>Duke CAD Index</b> |       |               | 0.300   |       |               |         |
| ≤ 40                  | 1.0   | reference     |         |       |               |         |
| 41 - 70               | 1.023 | 0.801 – 1.308 | 0.853   |       |               |         |
| 71 - 100              | 1.180 | 0.923 – 1.510 | 0.187   |       |               |         |
| <b>Treatment</b>      |       |               |         |       |               |         |
| MED                   | 1.0   | reference     |         | 1.0   | reference     |         |
| CABG + MED            | 0.764 | 0.628 – 0.930 | 0.007   | 0.802 | 0.655 – 0.981 | 0.032   |

496

497 **Table 2.** Univariate and multivariate Cox proportional hazards models of OS for patients with ischemic cardiomyopathy and heart  
498 failure in the training group. HR = hazards ratio; CI = confidence interval; eGFR = estimated glomerular filtration rate; NYHA = New

499 York Heart Association; CCI = Charlson co-morbidity index; LVEF = left ventricular ejection fraction; ESVI = end-systolic volume  
500 index; CAD = coronary artery disease; CABG = coronary artery bypass grafting; MED = medical.

501

502

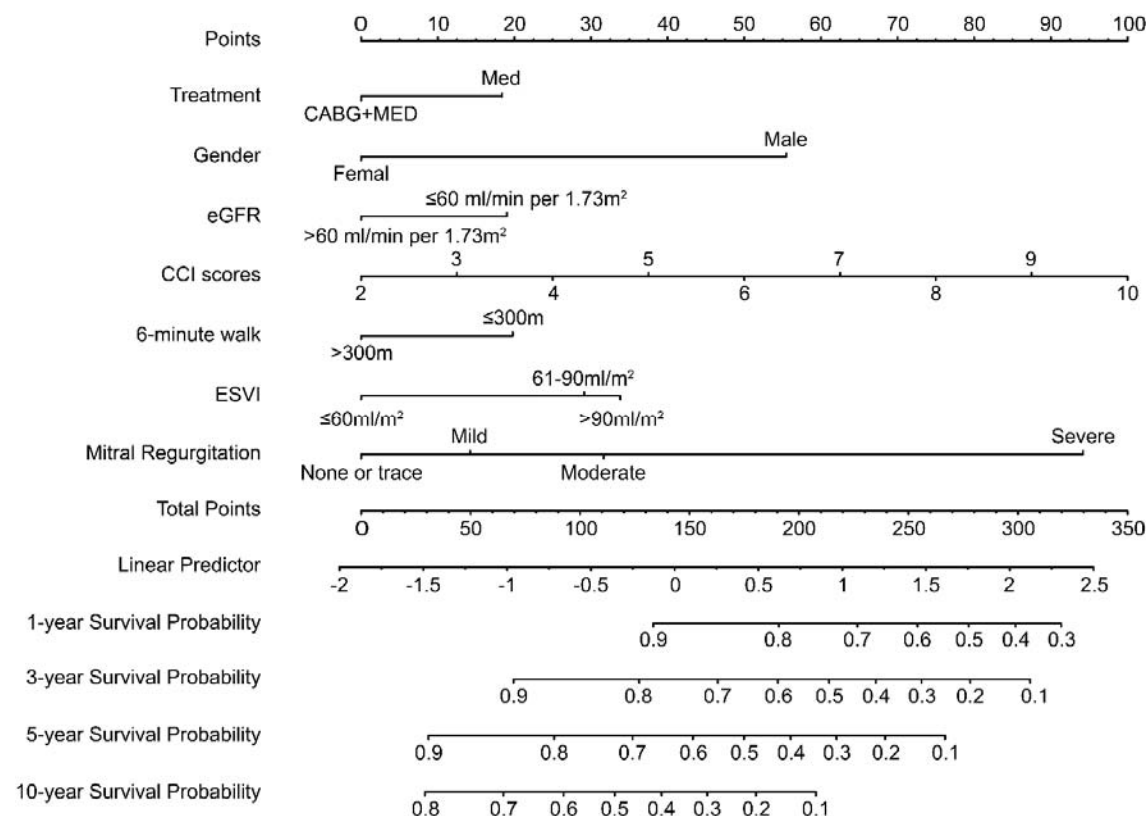

**Figure 2.** Nomogram for 1-year, 3-year, 5-year, and ten-year prediction of overall survival for patients with ischemic cardiomyopathy and heart failure. CABG = coronary artery bypass grafting; MED = medical; eGFR = estimated glomerular filtration rate; CCI = Charlson co-morbidity index; ESVI = end-systolic volume index.

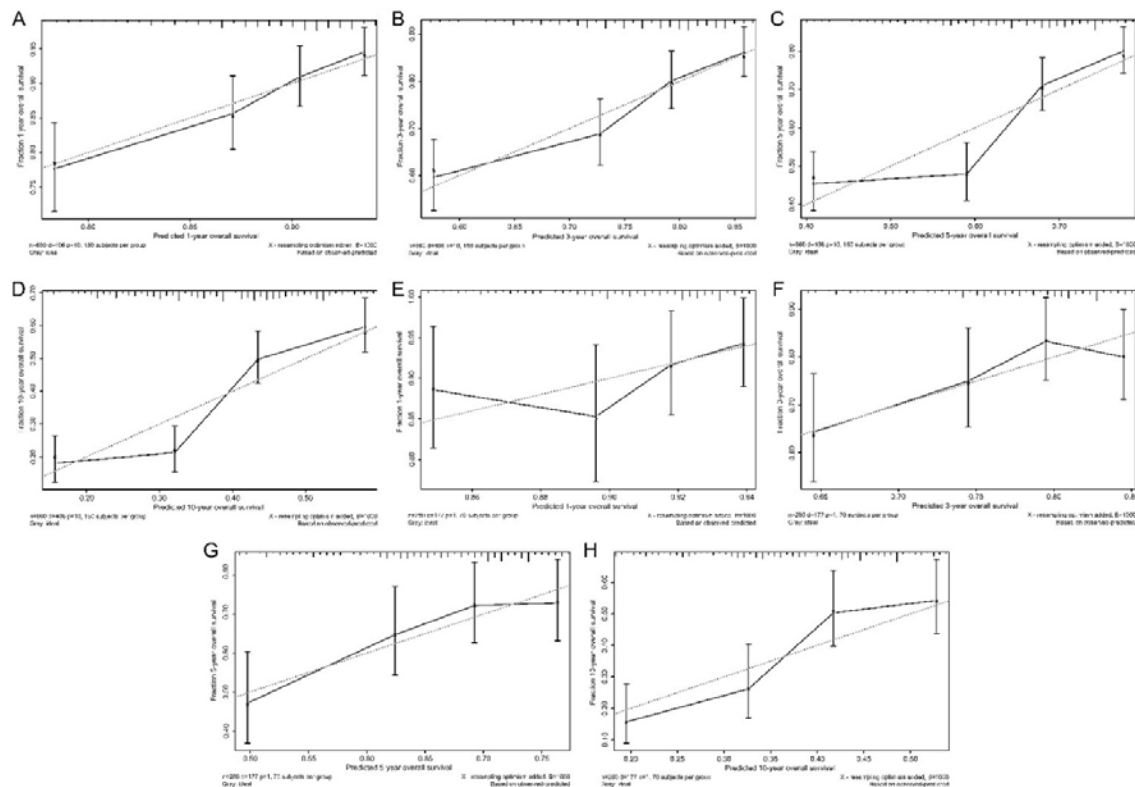

**Figure 3.** Calibration curves of 1-year, 3-year, 5-year, and ten-year overall survival (OS) for patients with ischemic cardiomyopathy and heart failure. A: 1-year OS in training group; B: 3-year OS in the training group; C: 5-year OS in the training group; D: ten-year OS in the training group; E: 1-year OS in the validation group; F: 3-year OS in the validation group; G: 5-year OS in the validation group; H: ten-year OS in the validation group.

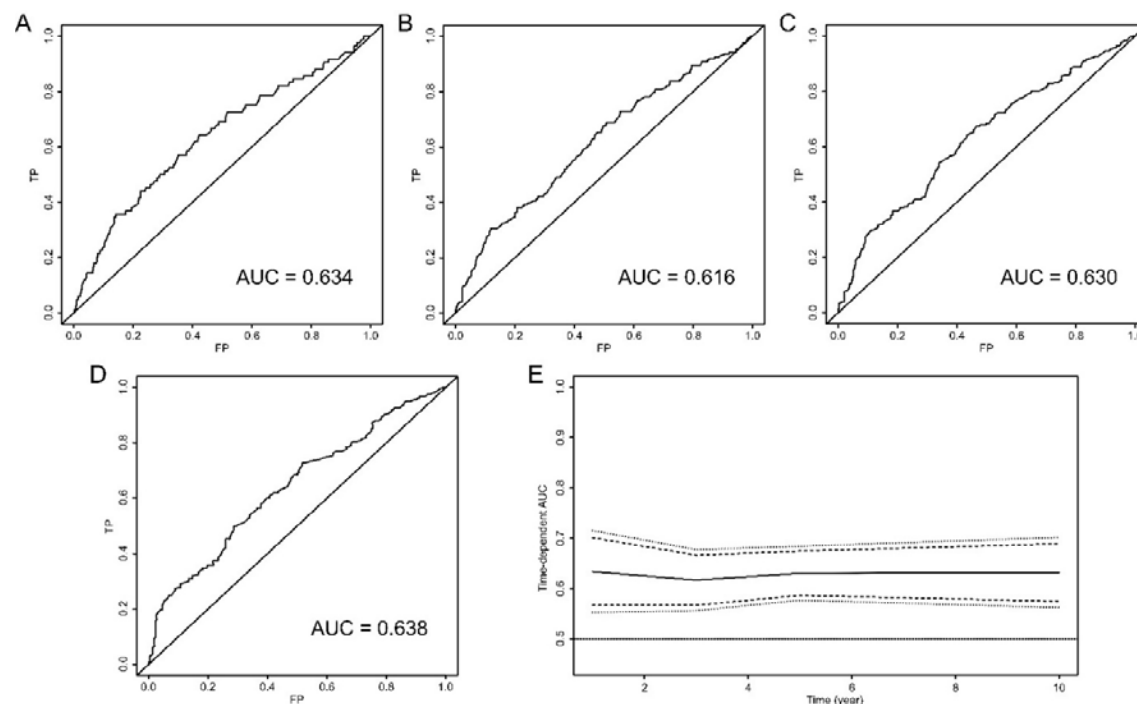

**Figure 4.** Time-dependent receiver operating characteristic curves of the overall survival (OS) in the training group for patients with ischemic cardiomyopathy and heart failure. A: 1-year OS; B: 3-year OS; C: 5-year OS; D: ten-year OS; E: time-dependent area under curve (AUC).

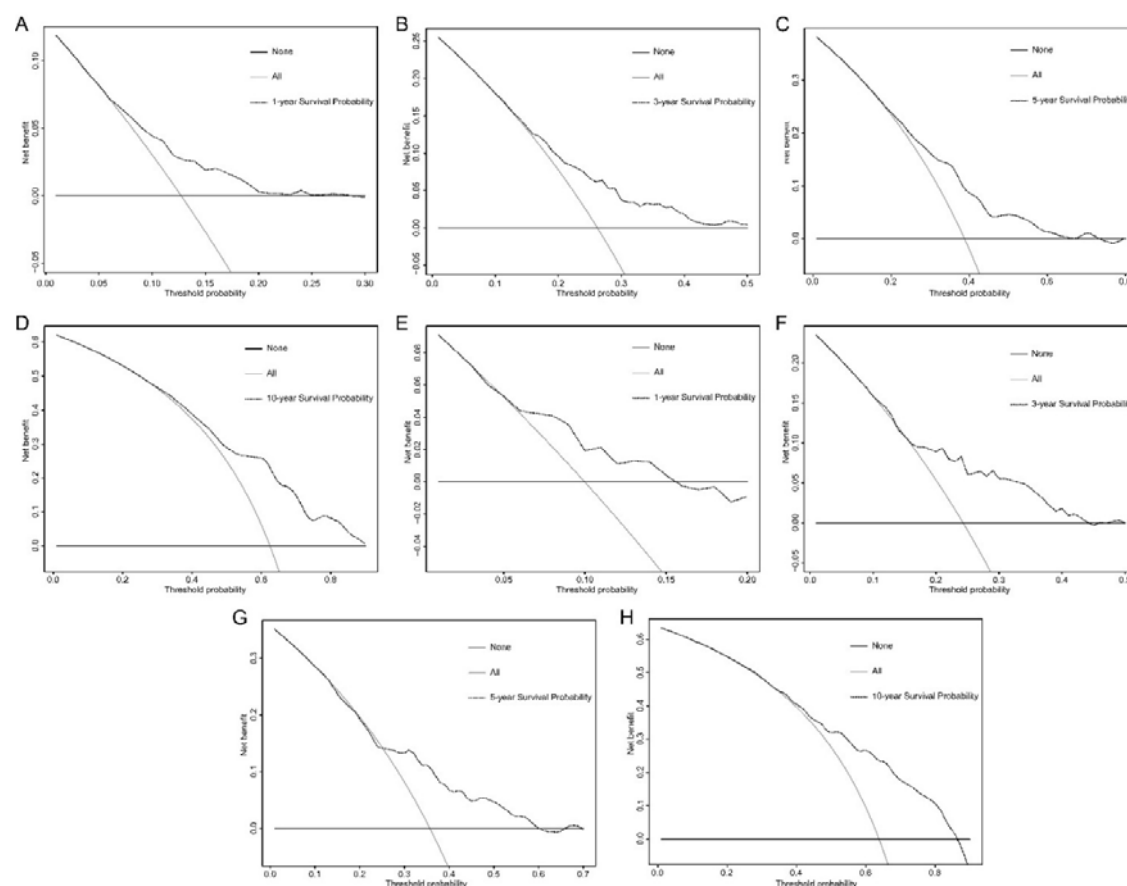

**Figure 5.** Decision Curve Analysis of the nomogram in training group (A: 1-year OS, B: 3-year OS, C: 5-year OS, D: ten-year OS) and verification group (E: 1-year OS, F: 3-year OS, G: 5-year OS, H: ten-year OS). The horizontal black solid lines assumed all cases were alive, and the oblique gray solid lines assumed all cases were dead. The black dash lines represented net benefit of the model during the application in clinical decision-making. OS = overall survival.

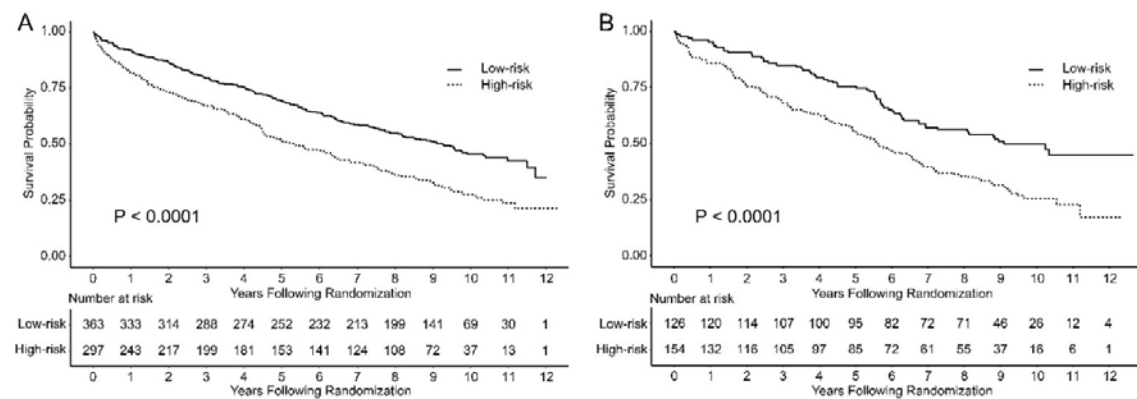

**Figure 6.** Kaplan-Meier survival analysis of overall survival among patients with low-risk group and patients with high-risk group in training and validation groups. A: training group; B: validation group.
